# Supplementary material
Source: PubMed Central journal article supplement (PMC9106893)
Supplement: NIHMS1790789-supplement-Source_Data_Fig3j.pdf [file NIHMS1790789-supplement-Source_Data_Fig3j.pdf]

# Figure 3J

|                                                |   |   |    |    |    |   |    |    |    |   |
|------------------------------------------------|---|---|----|----|----|---|----|----|----|---|
| <i>E. coli</i>                                 | - | - | -  | -  | -  | - | -  | -  | -  | L |
| <i>L. innocua</i>                              | - | L | HK | HK | HK | L | HK | HK | HK | - |
| <i>L. innocua</i> RNA <sub>tot</sub> (10μg/mL) | - | - | -  | +  | -  | - | -  | +  | -  | - |
| <i>E. coli</i> RNA <sub>tot</sub> (10μg/mL)    | - | - | -  | -  | +  | - | -  | -  | +  | - |
| LPS (100ng/mL)                                 | - | - | -  | -  | -  | + | +  | +  | +  | - |

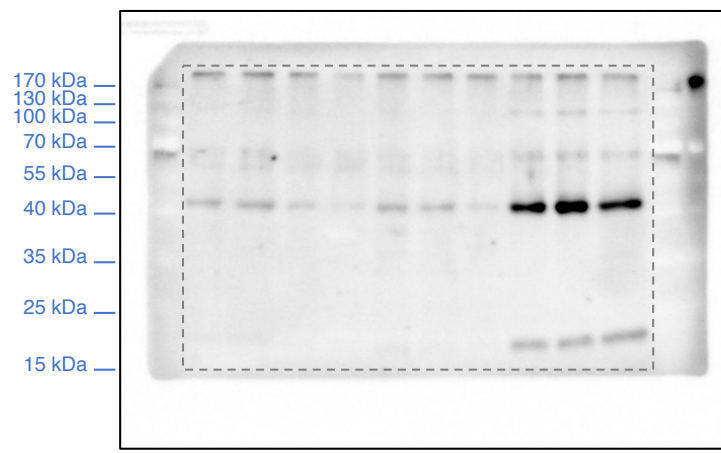

Crosslinked Fractions  
 ASC  
 Monomer ~22kDa  
 Dimer ~ 45kDa  
 Oligomers above 45kDa

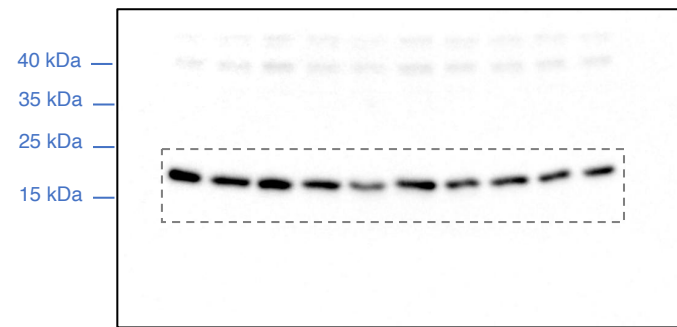

WCE  
 ASC  
 ~22kDa
