# Supplementary material
Source: PubMed Central journal article supplement (PMC9106893)

Figure 6B

|                                                 |   |   |    |    |   |    |    |   |
|-------------------------------------------------|---|---|----|----|---|----|----|---|
| <i>E. coli</i>                                  | - | - | -  | -  | - | -  | -  | L |
| <i>Y. pestis</i> (24°C)                         | - | L | HK | HK | - | -  | -  | - |
| <i>Y. pestis</i> RNA <sub>tot</sub> (10µg/mL)   | - | - | -  | +  | - | -  | -  | - |
| <i>F. novicida</i> Δ <i>lpxF</i>                | - | - | -  | -  | L | HK | HK | - |
| <i>F. novicida</i> RNA <sub>tot</sub> (10µg/mL) | - | - | -  | -  | - | -  | +  | - |

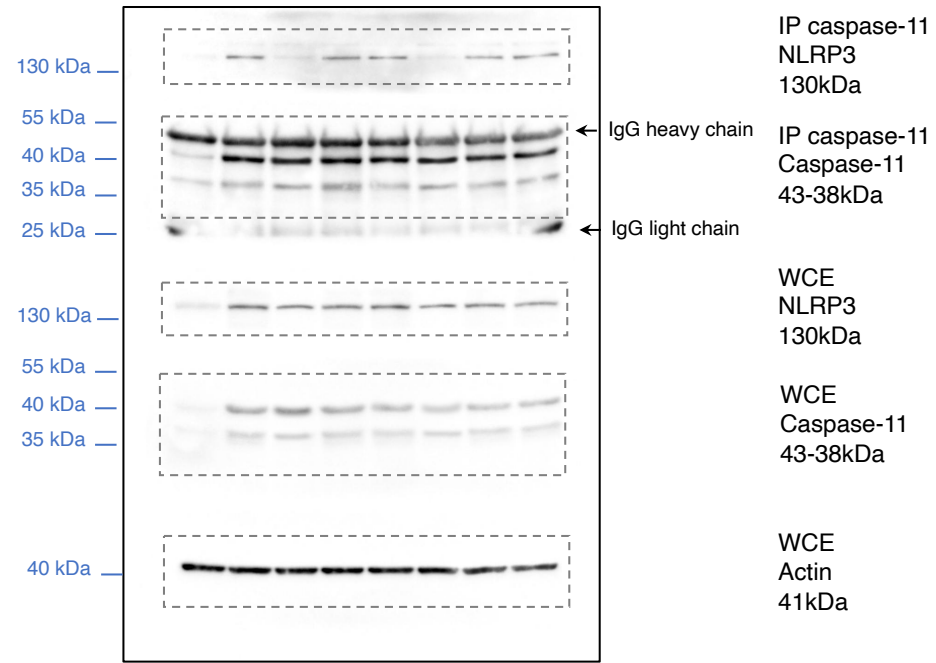

Supplement: NIHMS1790789-supplement-Source_Data_Fig6b.pdf [file NIHMS1790789-supplement-Source_Data_Fig6b.pdf]
