# Supplementary material
Source: PubMed Central journal article supplement (PMC9106893)

# Figure 1A

|                                                |   |   |    |    |    |
|------------------------------------------------|---|---|----|----|----|
| <i>E. coli</i>                                 | - | L | HK | HK | HK |
| <i>E. coli</i> RNA <sub>tot</sub> (10μg/mL)    | - | - | -  | +  | -  |
| <i>L. innocua</i> RNA <sub>tot</sub> (10μg/mL) | - | - | -  | -  | +  |

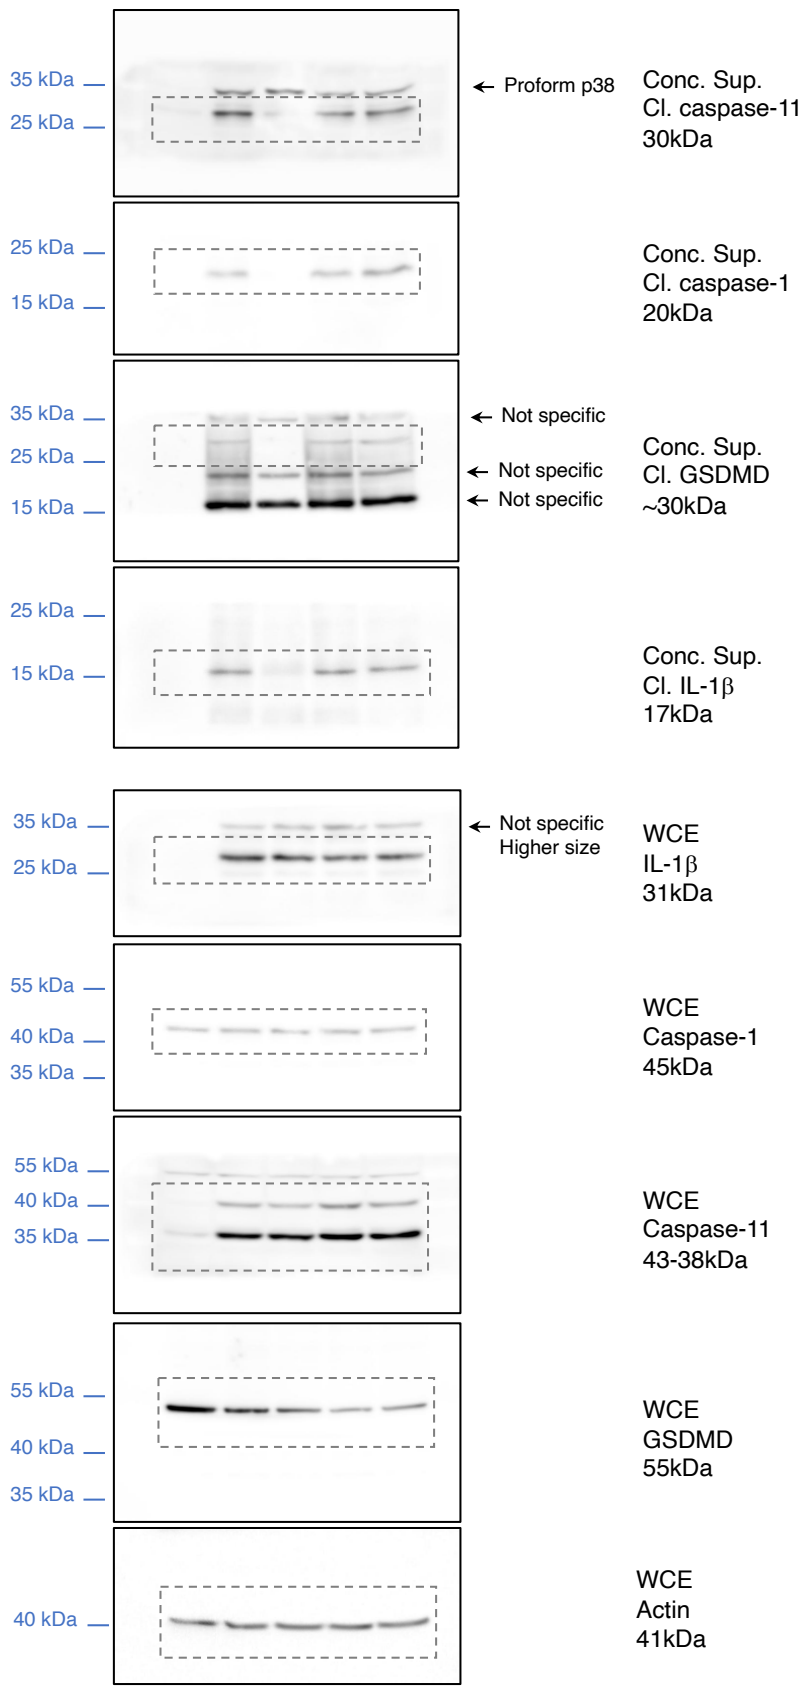

Supplement: NIHMS1790789-supplement-Source_Data_Fig1a.pdf [file NIHMS1790789-supplement-Source_Data_Fig1a.pdf]

# Figure 4B

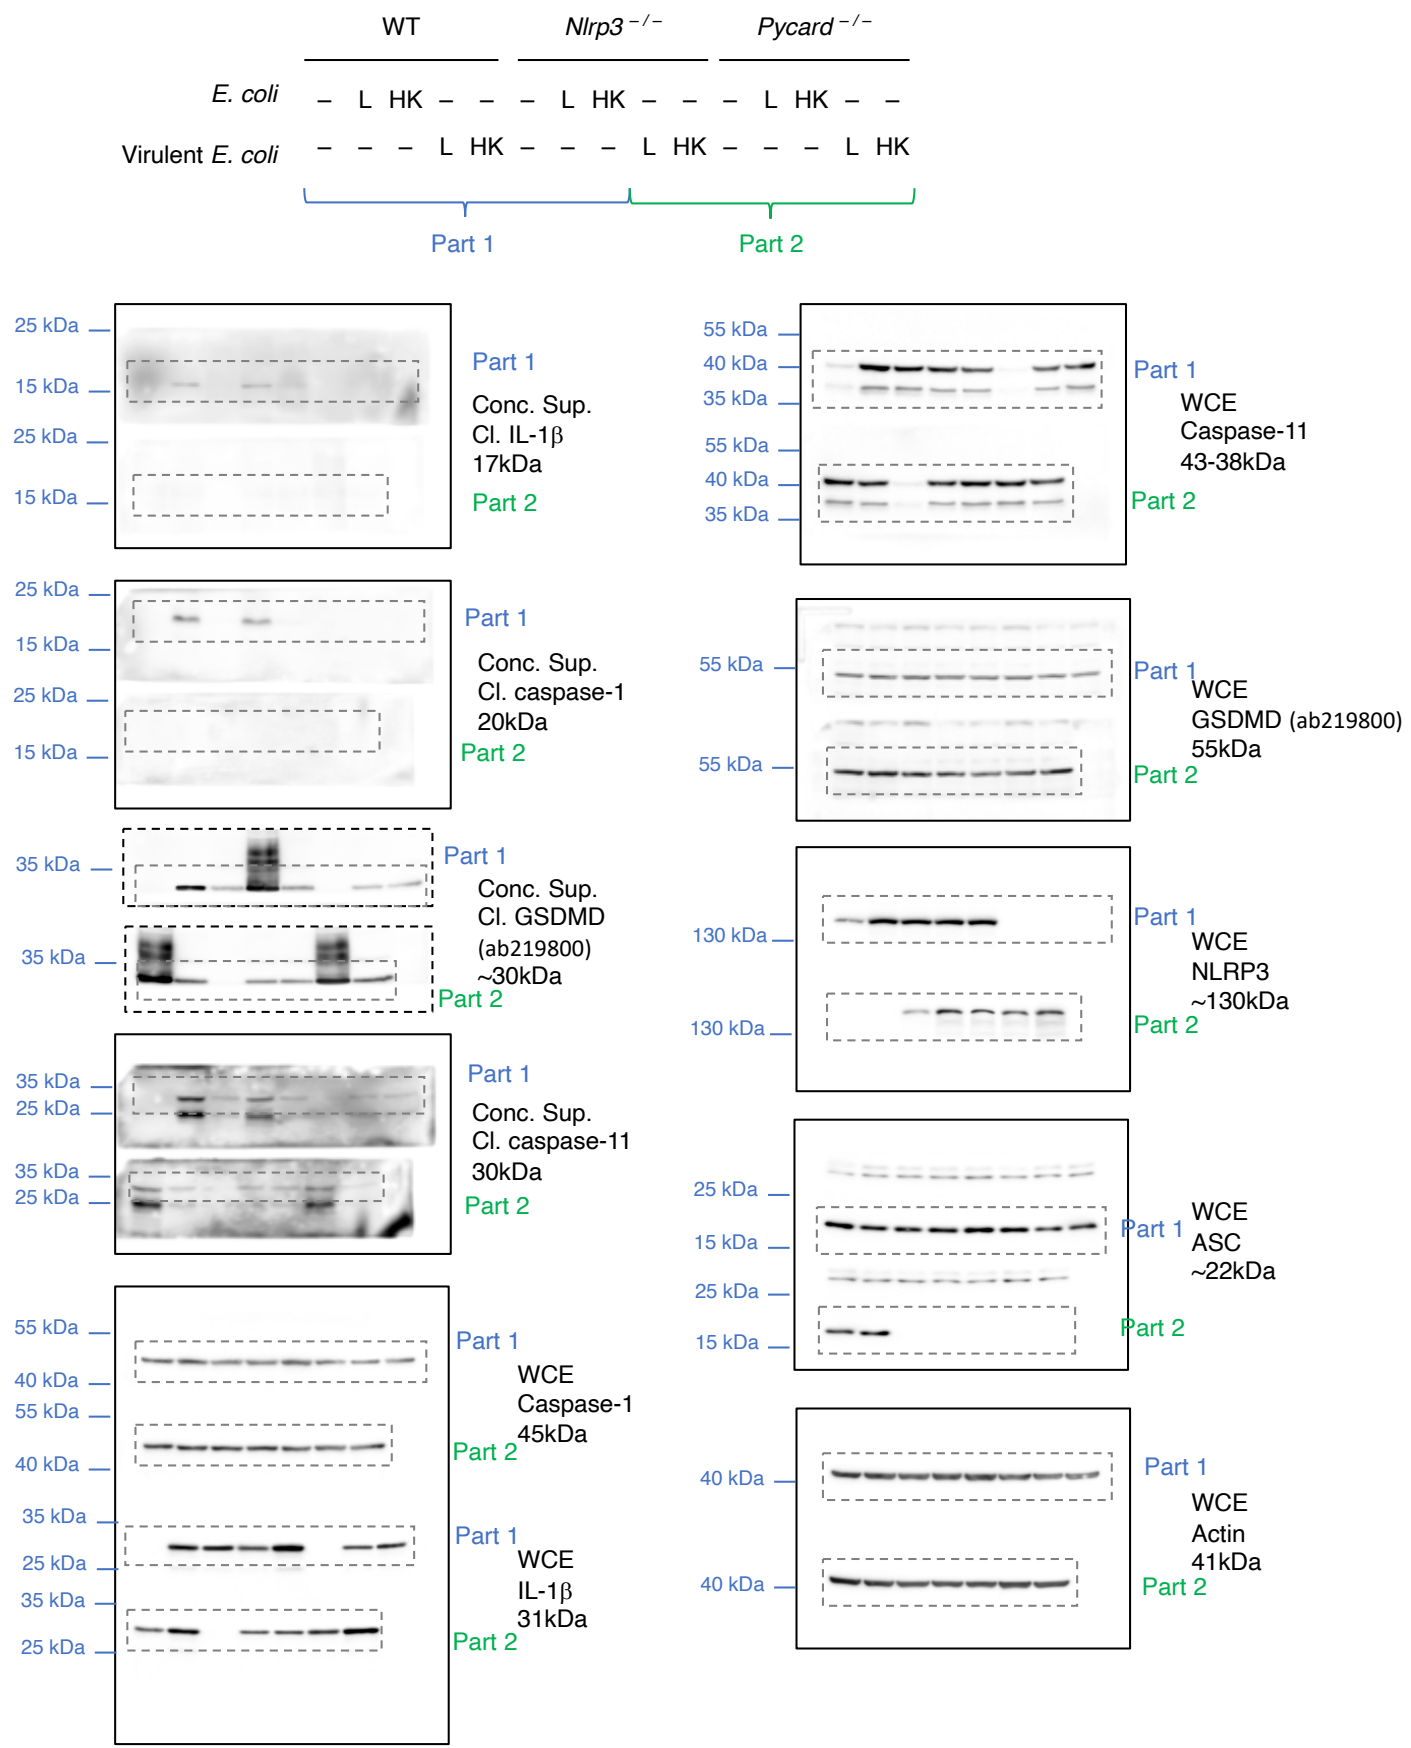

Supplement: NIHMS1790789-supplement-Source_Data_Fig4b.pdf [file NIHMS1790789-supplement-Source_Data_Fig4b.pdf]
